# Supplementary material for: Distinct T cell chromatin landscapes in circulating lymphocytes from patients with systemic sclerosis
Source: bioRxiv or medRxiv preprint supplement (doi:10.1101/2021.01.10.426131), 2026-02-08
Supplement: Supplementary file [file media-1.pdf]

| Sample ID   | Treatment Group | Time 1 from MMF start | Baseline Visit to Time 1 | Time 1 to Time 2 | Time 2 to Time 3 | Time 1 to Time 3 | Baseline Visit from Raynaud's Onset | MRSS at Baseline Visit |
|-------------|-----------------|-----------------------|--------------------------|------------------|------------------|------------------|-------------------------------------|------------------------|
| SScReg-1736 | Other           | NA                    | 19 months                | 6 months         | 4 months         | 10 months        | 74 months                           | 9                      |
| SScReg-1891 | MMF             | 0 months              | Baseline                 | 4 months         | 2 months         | 7 months         | 9 months                            | 21                     |
| SScReg-1753 | MMF             | 12 months             | 12 months                | 4 months         | 12 months        | 16 months        | 16 months                           | 12                     |
| SScReg-1896 | MMF             | 0 months              | Baseline                 | 2.5 months       | 3.5 months       | 6 months         | 16.5 months                         | 16                     |
| SScReg-1759 | MMF             | 11 months             | 11 months                | 11 months        | 13 months        | 24 months        | 7 months                            | 13                     |
| SScReg-1904 | MMF             | 0 months              | Baseline                 | 1 month          | 3.5 months       | 4.5 months       | 132.5 months                        | 25                     |
| SScReg-1469 | Naïve           | NA                    | Baseline                 | 5.5 months       | 11 months        | 16.5 months      | 89 months                           | 14                     |
| SScReg-1906 | Other           | NA                    | 2 months                 | 2.5 months       | 2.5 months       | 5 months         | 4.5 months                          | 32                     |
| SScReg-1822 | MMF             | 1 month               | 1 month                  | 3.5 months       | 8 months         | 11.5 months      | 0.5 months                          | 2                      |
| SScReg-1837 | MMF             | 0 months              | Baseline                 | 10 months        | 2 months         | 12 months        | 6 months                            | 43                     |
| SScReg-1858 | Naïve           | NA                    | Baseline                 | 5.5 months       | 4.5 months       | 10 months        | 41 months                           | 7                      |
| SScReg-1919 | MMF             | 0 months              | Baseline                 | 2.5 months       | 4 months         | 6.5 months       | 7 months                            | 19                     |
| SScReg-1823 | Naïve           | NA                    | Baseline                 | 7 months         | 6 months         | 13 months        | 30 months                           | 6                      |
| SScReg-1916 | MMF             | 0 months              | Baseline                 | 7.5 months       | 6.5 months       | 13 months        | 5 months                            | 18                     |
| SScReg-1832 | MMF             | 0 months              | Baseline                 | 3 months         | 3.5 months       | 6.5 months       | 4.5 months                          | 3                      |
| SScReg-1861 | MMF             | 0 months              | Baseline                 | 3.5 months       | 2.5 months       | 6 months         | 88 months                           | 7                      |
| SScReg-1073 | 0               | NA                    | 18.5 months              | 4.5 months       | 8.5 months       | 13 months        | 142.5 months                        | 9                      |
| SScReg-1886 | MMF             | 0 months              | 2 months                 | 0.5 months       | 1.5 months       | 2 months         | 16 months                           | 24                     |

**Color Index**

Treatment Group 1 MMF Baseline (0-2 months)

Treatment Group 1 MMF Not Considered Baseline

Treatment Naïve Group

Other Treatment Group

**Supplemental Table 1: Patient Timepoint Table.** Timepoint information (calculated in 0.5 month intervals) and baseline MRSS information for each patient.
