# Supplementary material for: Distinct T cell chromatin landscapes in circulating lymphocytes from patients with systemic sclerosis
Source: bioRxiv or medRxiv preprint supplement (doi:10.1101/2021.01.10.426131), 2026-02-08
Supplement: Supplementary file [file media-2.pdf]

| Sample ID       | TotalRawReads | OverallAlignmentRate | finalMappedReads | finalMappedPerc | chrMcount | chrMPerc | blackListCount | blackListPerc | qcFilteredCount | qcFilteredPerc | DuplicateCount | dupPerc | TSS  |
|-----------------|---------------|----------------------|------------------|-----------------|-----------|----------|----------------|---------------|-----------------|----------------|----------------|---------|------|
| SSc-Reg_1736_t1 | 40416444      | 96.83%               | 28903734         | 71.51%          | 3745095   | 4.63%    | 0              | 0%            | 12678052        | 15.68%         | 4043698        | 5%      | 17.7 |
| SSc-Reg_1891_t1 | 15912755      | 95.57%               | 7422303          | 46.64%          | 10947758  | 34.40%   | 0              | 0%            | 3510354         | 11.03%         | 1113706        | 3.50%   | 26.3 |
| SSc-Reg_1736_t2 | 20264742      | 96.96%               | 14628532         | 72.19%          | 2726442   | 6.73%    | 0              | 0%            | 6249731         | 15.42%         | 1063628        | 2.62%   | 12.6 |
| SSc-Reg_1891_t2 | 22773257      | 95.45%               | 16304723         | 71.60%          | 794140    | 1.74%    | 0              | 0%            | 6675629         | 14.66%         | 3392814        | 7.45%   | 22.7 |
| SSc-Reg_1736_t3 | 16879942      | 97.63%               | 13123035         | 77.74%          | 1153612   | 3.42%    | 0              | 0%            | 4690523         | 13.89%         | 869816         | 2.58%   | 15   |
| SSc-Reg_1891_t3 | 20072572      | 95.10%               | 14600372         | 72.74%          | 837092    | 2.09%    | 0              | 0%            | 5746626         | 14.31%         | 2392152        | 5.96%   | 20.9 |
| SSc-Reg_1753_t1 | 16008123      | 97.54%               | 12329532         | 77.02%          | 1028818   | 3.21%    | 0              | 0%            | 4810927         | 15.03%         | 730464         | 2.28%   | 13.4 |
| SSc-Reg_1896_t1 | 19843555      | 95.22%               | 14409563         | 72.62%          | 700624    | 1.77%    | 0              | 0%            | 5646163         | 14.23%         | 2622298        | 6.61%   | 22.6 |
| SSc-Reg_1753_t2 | 28928798      | 96.84%               | 20992936         | 72.57%          | 2505027   | 4.33%    | 0              | 0%            | 9424517         | 16.29%         | 2116722        | 3.66%   | 16.2 |
| SSc-Reg_1896_t2 | 33421752      | 95.18%               | 23840338         | 71.33%          | 1345598   | 2.01%    | 0              | 0%            | 9894016         | 14.80%         | 4699086        | 7.03%   | 20.4 |
| SSc-Reg_1753_t3 | 28802582      | 97.21%               | 21666065         | 75.22%          | 1144756   | 1.99%    | 0              | 0%            | 9158297         | 15.90%         | 2362014        | 4.10%   | 17.7 |
| SSc-Reg_1896_t3 | 35194342      | 95.05%               | 24708975         | 70.21%          | 2381504   | 3.38%    | 0              | 0%            | 10321740        | 14.66%         | 4782008        | 6.79%   | 20.4 |
| SSc-Reg_1759_t1 | 10331426      | 97.58%               | 7715772          | 74.68%          | 308099    | 1.49%    | 0              | 0%            | 3141997         | 15.21%         | 1280352        | 6.20%   | 9.7  |
| SSc-Reg_1904_t1 | 44272014      | 94.99%               | 31358393         | 70.83%          | 1720251   | 1.94%    | 0              | 0%            | 13056402        | 14.75%         | 6616684        | 7.47%   | 17.6 |
| SSc-Reg_1759_t2 | 27684623      | 97.17%               | 20767237         | 75.01%          | 456677    | 0.82%    | 0              | 0%            | 10361909        | 18.71%         | 1446500        | 2.61%   | 7.4  |
| SSc-Reg_1904_t2 | 35013059      | 94.89%               | 24913356         | 71.15%          | 2907656   | 4.15%    | 0              | 0%            | 9909838         | 14.15%         | 3800234        | 5.43%   | 16.2 |
| SSc-Reg_1759_t3 | 24128415      | 97.58%               | 17364783         | 71.97%          | 3377036   | 7%       | 0              | 0%            | 7187082         | 14.89%         | 1796744        | 3.72%   | 17.5 |
| SSc-Reg_1904_t3 | 19720905      | 94.82%               | 14572732         | 73.89%          | 973576    | 2.47%    | 0              | 0%            | 6248996         | 15.84%         | 1032514        | 2.62%   | 12.8 |
| SSc-Reg_1469_t1 | 31660240      | 96.71%               | 24122296         | 76.19%          | 872936    | 1.38%    | 0              | 0%            | 10174554        | 16.07%         | 1943064        | 3.07%   | 14.5 |
| SSc-Reg_1906_t1 | 23909814      | 95.54%               | 17811349         | 74.49%          | 596113    | 1.25%    | 0              | 0%            | 7880490         | 16.48%         | 1586112        | 3.32%   | 7.9  |
| SSc-Reg_1822_t1 | 39308463      | 95.85%               | 26863365         | 68.34%          | 2188862   | 2.78%    | 0              | 0%            | 11458240        | 14.57%         | 7977218        | 10.15%  | 19.6 |
| SSc-Reg_1837_t1 | 30601563      | 96.47%               | 22008856         | 71.92%          | 1506794   | 2.46%    | 0              | 0%            | 9095736         | 14.86%         | 4425470        | 7.23%   | 17   |
| SSc-Reg_1904_t2 | 49766121      | 96.77%               | 35133026         | 70.60%          | 1997334   | 2.01%    | 0              | 0%            | 16581315        | 16.66%         | 7472936        | 7.51%   | 15.6 |
| SSc-Reg_1469_t2 | 29986741      | 96.35%               | 22364409         | 74.58%          | 1188925   | 1.98%    | 0              | 0%            | 9749302         | 16.26%         | 2119688        | 3.53%   | 16.7 |
| SSc-Reg_1906_t2 | 18472498      | 94.95%               | 13838110         | 74.91%          | 758915    | 2.05%    | 0              | 0%            | 5566661         | 15.07%         | 1077702        | 2.92%   | 15   |
| SSc-Reg_1469_t3 | 20013517      | 96.79%               | 15400975         | 76.95%          | 830317    | 2.07%    | 0              | 0%            | 5688704         | 14.21%         | 1421950        | 3.55%   | 19   |
| SSc-Reg_1906_t3 | 25640576      | 95.20%               | 18942412         | 73.88%          | 1174582   | 2.29%    | 0              | 0%            | 7510833         | 14.65%         | 2246942        | 4.38%   | 18.5 |
| SSc-Reg_1858_t1 | 29717484      | 96.89%               | 22362218         | 75.25%          | 1275996   | 2.15%    | 0              | 0%            | 8437052         | 14.20%         | 3151232        | 5.30%   | 20   |
| SSc-Reg_1919_t1 | 14284008      | 95.32%               | 10682288         | 74.78%          | 838565    | 2.94%    | 0              | 0%            | 4274945         | 14.96%         | 752668         | 2.63%   | 17.3 |
| SSc-Reg_1858_t2 | 21081680      | 97.30%               | 16435199         | 77.96%          | 974073    | 2.31%    | 0              | 0%            | 6058122         | 14.37%         | 1120980        | 2.66%   | 15.1 |
| SSc-Reg_1919_t2 | 12278673      | 94.46%               | 9135989          | 74.41%          | 503190    | 2.05%    | 0              | 0%            | 3972332         | 16.18%         | 449246         | 1.83%   | 12.8 |
| SSc-Reg_1858_t3 | 25385928      | 97.12%               | 18347205         | 72.27%          | 1182737   | 2.33%    | 0              | 0%            | 8367522         | 16.48%         | 3065580        | 6.04%   | 14   |
| SSc-Reg_1919_t3 | 22861039      | 95.36%               | 16756757         | 73.30%          | 995592    | 2.18%    | 0              | 0%            | 6704086         | 14.66%         | 2388854        | 5.22%   | 21.4 |
| SSc-Reg_1823_t1 | 33342850      | 96.89%               | 24269777         | 72.79%          | 2797356   | 4.19%    | 0              | 0%            | 10329672        | 15.49%         | 2946970        | 4.42%   | 17.6 |
| SSc-Reg_1823_t2 | 18106070      | 97.80%               | 13927026         | 76.92%          | 1442896   | 3.98%    | 0              | 0%            | 5201316         | 14.36%         | 917170         | 2.53%   | 16.2 |
| SSc-Reg_1823_t3 | 27298678      | 97.23%               | 20854562         | 76.39%          | 1252911   | 2.29%    | 0              | 0%            | 8202298         | 15.02%         | 1919136        | 3.52%   | 17   |
| SSc-Reg_1916_t1 | 33667573      | 96.24%               | 23647974         | 70.24%          | 5337396   | 7.93%    | 0              | 0%            | 9491786         | 14.10%         | 2680096        | 3.98%   | 12.8 |
| SSc-Reg_1916_t2 | 28960237      | 96.43%               | 21576444         | 74.50%          | 2426102   | 4.19%    | 0              | 0%            | 8225160         | 14.20%         | 2051238        | 3.54%   | 16.7 |
| SSc-Reg_1822_t2 | 42571154      | 95.63%               | 29009220         | 68.14%          | 3361925   | 3.95%    | 0              | 0%            | 12037647        | 14.14%         | 8003060        | 9.40%   | 20.3 |
| SSc-Reg_1837_t2 | 55650708      | 96.07%               | 38616734         | 69.39%          | 4747122   | 4.27%    | 0              | 0%            | 17968959        | 16.14%         | 6973798        | 6.27%   | 14.7 |
| SSc-Reg_1916_t3 | 56554146      | 95.84%               | 40298648         | 71.26%          | 2451324   | 2.17%    | 0              | 0%            | 19033745        | 16.83%         | 6324342        | 5.59%   | 16.4 |
| SSc-Reg_1822_t3 | 30889736      | 96.03%               | 21373794         | 69.19%          | 1185332   | 1.92%    | 0              | 0%            | 8773059         | 14.20%         | 6623850        | 10.72%  | 19.1 |
| SSc-Reg_1837_t3 | 72059441      | 95.66%               | 49422677         | 68.59%          | 2949803   | 2.05%    | 0              | 0%            | 23817519        | 16.53%         | 12255574       | 8.50%   | 16.8 |
| SSc-Reg_1832_t1 | 42386961      | 97.68%               | 30442388         | 71.82%          | 6562618   | 7.74%    | 0              | 0%            | 12098565        | 14.27%         | 3265018        | 3.85%   | 14.2 |
| SSc-Reg_1861_t1 | 43832686      | 96.08%               | 29132397         | 66.46%          | 1043041   | 1.19%    | 0              | 0%            | 12968909        | 14.79%         | 11953564       | 13.64%  | 19.9 |
| SSc-Reg_1832_t2 | 80440865      | 96.96%               | 56206735         | 69.87%          | 8211689   | 5.10%    | 0              | 0%            | 25572460        | 15.90%         | 9800978        | 6.09%   | 13   |
| SSc-Reg_1861_t2 | 35489222      | 95.86%               | 24531895         | 69.12%          | 1994863   | 2.81%    | 0              | 0%            | 10504709        | 14.80%         | 6474794        | 9.12%   | 17.3 |
| SSc-Reg_1832_t3 | 51220870      | 97%                  | 37328610         | 72.88%          | 2634904   | 2.57%    | 0              | 0%            | 15230786        | 14.87%         | 6842212        | 6.68%   | 16.8 |
| SSc-Reg_1861_t3 | 34495060      | 95.88%               | 22490966         | 65.20%          | 1508123   | 2.19%    | 0              | 0%            | 9901992         | 14.35%         | 9758632        | 14.14%  | 21.4 |
| SSc-Reg_1073_t1 | 44895830      | 97.27%               | 34217037         | 76.21%          | 2029124   | 2.26%    | 0              | 0%            | 12740081        | 14.19%         | 4140254        | 4.61%   | 15.7 |
| SSc-Reg_1886_t1 | 18326765      | 95.10%               | 11322781         | 61.78%          | 6192622   | 16.90%   | 0              | 0%            | 5008384         | 13.66%         | 1011396        | 2.76%   | 14.5 |
| SSc-Reg_1073_t2 | 44549409      | 96.55%               | 31877010         | 71.55%          | 2558428   | 2.87%    | 0              | 0%            | 14505529        | 16.28%         | 5203210        | 5.84%   | 18.6 |
| SSc-Reg_1886_t2 | 25858442      | 95.16%               | 14378683         | 55.61%          | 11411239  | 22.06%   | 0              | 0%            | 6815625         | 13.18%         | 2227194        | 4.31%   | 17.6 |
| SSc-Reg_1073_t3 | 53343183      | 96.61%               | 37618376         | 70.52%          | 4033189   | 3.78%    | 0              | 0%            | 19191802        | 17.99%         | 4612126        | 4.32%   | 14.2 |
| SSc-Reg_1886_t3 | 16035523      | 95.39%               | 9731575          | 60.69%          | 5856874   | 18.26%   | 0              | 0%            | 4525163         | 14.11%         | 746986         | 2.33%   | 14.8 |

Supplemental Table 2: QC Table. Quality Check metrics of ATAC-seq libraries for Ssc study.
